# Supplementary material
Source: publisher figshare collection journal article supplement (https://acs.figshare.com/ndownloader/files/4674172)
Supplement: Supplementary file 1 [file 4674172]

data_General
_audit_creation_date                  '2007-04-24'
_audit_creation_method                'by CrystalStructure 3.8'
_audit_update_record                   ?

#==============================================================================

# PROCESSING SUMMARY (IUCr Office Use Only)

_journal_date_recd_electronic     ?
_journal_date_from_coeditor       ?
_journal_date_accepted            ?
_journal_coeditor_code            ?

#==============================================================================

# SUBMISSION DETAILS

_publ_contact_author_name             'Masayoshi Onishi'
_publ_contact_author_address
;
    Department of Applied Chemistry
    Faculty of Engineering
    Nagasaki University
    Nagasaki 852-8521
    Japan
;
_publ_contact_author_email            'onishi@nagasaki-u.ac.jp'
_publ_contact_author_fax              '+81-95-819-2684'
_publ_contact_author_phone            '+81-95-819-2671'
_publ_contact_letter
;
    ENTER TEXT OF LETTER
;
_publ_requested_journal               'Journal of the American Chemical Society'
_publ_requested_category              'CHOOSE FI FM FO CI CM CO or AD'
_publ_requested_coeditor_name          ?

#==============================================================================

# TITLE AND AUTHOR LIST

_publ_section_title
;
Reversible N-N Coupling of NO ligands on Dinuclear Ruthenium Complexes and 
Subsequent N2O Evolution: Relevance to Nitric Oxide Reductase
;
_publ_section_title_footnote
;
    ENTER FOOTNOTE TO TITLE OF PAPER
;
loop_
_publ_author_name
_publ_author_footnote
_publ_author_address
'Yasuhiro Arikawa'
;
  FIRST AUTHORS FOOTNOTES
;
;
    Department of Applied Chemistry
    Faculty of Engineering
    Nagasaki University
    Nagasaki 852-8521
    Japan
;
_publ_section_synopsis
;
  ENTER SYNOPSIS
;

#==============================================================================

# TEXT

_publ_section_abstract
;
    ENTER ABSTRACT
;
_publ_section_comment
;
    ENTER TEXT
;
_publ_section_references
;
    ENTER OTHER REFERENCES

    Rigaku/MSC and Rigaku Corporation. (2006).
    CrystalStructure (Version 3.8). 
    Single Crystal Structure Analysis Software.
    Rigaku/MSC, 9009 TX, USA 77381-5209.
    Rigaku, Tokyo 196-8666, Japan.

    Carruthers, J.R., Rollett,J.S., Betteridge, P.W.,
	 Kinna, D., Pearce, L., Larsen, A., and Gabe, E.(1999)
    CRYSTALS Issue 11, Chemical Crystallography Laboratory, Oxford, UK.

;
_publ_section_figure_captions
;
    ENTER FIGURE CAPTIONS
;
_publ_section_exptl_prep
;
    ENTER COMPOUND PREPARATION DETAILS
;
_publ_section_exptl_refinement
;
    ENTER SPECIAL DETAILS OF THE REFINEMENT
;

#==============================================================================

data___0616b

#==============================================================================

# CHEMICAL DATA

_chemical_formula_sum                  'C22 H24 B2 Br Cl2 N16 O2 Ru2 '
_chemical_formula_moiety               'C21 H22 B2 Br Cl N16 O2 Ru2, C H2 Cl '
_chemical_formula_weight               919.11
_chemical_melting_point                ?

#==============================================================================

# CRYSTAL DATA
_symmetry_cell_setting                 monoclinic
_symmetry_space_group_name_H-M        'C 1 2/m 1'
_symmetry_space_group_name_Hall       '-C 2y'
_symmetry_Int_Tables_number            12
loop_
_symmetry_equiv_pos_site_id
_symmetry_equiv_pos_as_xyz
1   '+X,+Y,+Z'
2   '-X,+Y,-Z'
3   '-X,-Y,-Z'
4   '+X,-Y,+Z'
5   '1/2+X,1/2+Y,+Z'
6   '1/2-X,1/2+Y,-Z'
7   '1/2-X,1/2-Y,-Z'
8   '1/2+X,1/2-Y,+Z'

#------------------------------------------------------------------------------

_cell_length_a                         15.6134(8)
_cell_length_b                         17.8813(7)
_cell_length_c                         14.8643(7)
_cell_angle_alpha                      90.0000
_cell_angle_beta                       115.7230(5)
_cell_angle_gamma                      90.0000
_cell_volume                           3738.7(3)
_cell_formula_units_Z                  4
_cell_measurement_reflns_used          4512
_cell_measurement_theta_min            3.2
_cell_measurement_theta_max            27.5
_cell_measurement_temperature          296.1

#------------------------------------------------------------------------------

_exptl_crystal_description            'block'
_exptl_crystal_colour                 'red'
_exptl_crystal_size_max                0.40
_exptl_crystal_size_mid                0.30
_exptl_crystal_size_min                0.20
_exptl_crystal_density_diffrn          1.633
_exptl_crystal_density_meas            ?
_exptl_crystal_density_method         'not measured'
_exptl_crystal_F_000                   1804.00
_exptl_absorpt_coefficient_mu          2.068
_exptl_absorpt_correction_type         multi-scan
_exptl_absorpt_process_details         
'Jacobson, R. (1998) Private communication'
_exptl_absorpt_correction_T_min        0.556
_exptl_absorpt_correction_T_max        0.661

#==============================================================================

# EXPERIMENTAL DATA

_diffrn_radiation_type                'Mo K\a'
_diffrn_radiation_wavelength           0.71070
_diffrn_measurement_device_type       'Rigaku Mercury'
_diffrn_measurement_method             \w
_diffrn_detector_area_resol_mean       7.31
_diffrn_reflns_number                  14389
_diffrn_reflns_av_R_equivalents        0.016
_diffrn_reflns_theta_max               27.48
_diffrn_measured_fraction_theta_max    0.962
_diffrn_reflns_theta_full              27.48
_diffrn_measured_fraction_theta_full   0.962
_diffrn_reflns_limit_h_min             -20
_diffrn_reflns_limit_h_max             11
_diffrn_reflns_limit_k_min             -23
_diffrn_reflns_limit_k_max             21
_diffrn_reflns_limit_l_min             -13
_diffrn_reflns_limit_l_max             19

#==============================================================================

# REFINEMENT DATA

_refine_special_details
;
    Refinement was performed using all reflections. The weighted 
    R-factor (wR) and goodness of fit (S) are based on F^2^.
    R-factor (gt) are based on F. The threshold expression of
    F^2^ > 2.0 sigma(F^2^) is used only for calculating R-factor (gt).
    Each asymmetric unit carries a half of CH2ClCH2Cl crystal solvent, whose 
    carbon atoms were disordered with occupancy factors of 0.5/0.5.  Their 
    hydrogen atoms were not located.  
;
_reflns_number_total                   4258
_reflns_number_gt                      3618
_reflns_threshold_expression           F^2^>2.0\s(F^2^)
_refine_ls_structure_factor_coef       Fsqd
_refine_ls_R_factor_gt                 0.0337
_refine_ls_wR_factor_ref               0.1011
_refine_ls_hydrogen_treatment          mixed
_refine_ls_number_reflns               4258
_refine_ls_number_parameters           237
_refine_ls_goodness_of_fit_ref         1.008
_refine_ls_weighting_scheme            calc
_refine_ls_weighting_details
'w = 1/[0.0012Fo^2^ + 1.0000\s(Fo^2^)]/(4Fo^2^)'
_refine_ls_shift/su_max                0.0000
_refine_diff_density_max               1.41
_refine_diff_density_min               -0.87
_refine_ls_extinction_method           none
_refine_ls_extinction_coef             ?

loop_
_atom_type_symbol
_atom_type_description
_atom_type_scat_dispersion_real
_atom_type_scat_dispersion_imag
_atom_type_scat_source
  'C' 'C'  0.003 0.002 
;
International Tables for Crystallography
(1992, Vol. C, Tables 4.2.6.8 and 6.1.1.4)
;
  'H' 'H'  0.000 0.000 
;
International Tables for Crystallography
(1992, Vol. C, Table 6.1.1.4)
;
  'B' 'B'  0.001 0.001 
;
International Tables for Crystallography
(1992, Vol. C, Tables 4.2.6.8 and 6.1.1.4)
;
  'Br' 'Br'  -0.290 2.459 
;
International Tables for Crystallography
(1992, Vol. C, Tables 4.2.6.8 and 6.1.1.4)
;
  'Cl' 'Cl'  0.148 0.159 
;
International Tables for Crystallography
(1992, Vol. C, Tables 4.2.6.8 and 6.1.1.4)
;
  'N' 'N'  0.006 0.003 
;
International Tables for Crystallography
(1992, Vol. C, Tables 4.2.6.8 and 6.1.1.4)
;
  'O' 'O'  0.011 0.006 
;
International Tables for Crystallography
(1992, Vol. C, Tables 4.2.6.8 and 6.1.1.4)
;
  'Ru' 'Ru'  -1.259 0.836 
;
International Tables for Crystallography
(1992, Vol. C, Tables 4.2.6.8 and 6.1.1.4)
;

#==============================================================================

# ATOMIC COORDINATES AND THERMAL PARAMETERS

loop_
_atom_site_label
_atom_site_type_symbol
_atom_site_fract_x
_atom_site_fract_y
_atom_site_fract_z
_atom_site_U_iso_or_equiv
_atom_site_adp_type
_atom_site_occupancy
_atom_site_symmetry_multiplicity
_atom_site_calc_flag
_atom_site_refinement_flags
_atom_site_disorder_assembly
_atom_site_disorder_group
 Ru(1) Ru 0.615470(10) 0.099140(10) 0.274590(10) 0.03011(6) Uani 1.00 1 d . . .
 Br(1) Br 0.28983(4) 0.0000 0.35747(6) 0.0767(2) Uani 1.00 2 d S . .
 Cl(1) Cl 0.61906(7) 0.0000 0.16586(7) 0.0394(2) Uani 1.00 2 d S . .
 Cl(2) Cl 0.98702(16) 0.0000 0.3516(2) 0.1159(8) Uani 1.00 2 d S . .
 O(1) O 0.78100(16) 0.07046(14) 0.45544(18) 0.0558(6) Uani 1.00 1 d . . .
 N(1) N 0.71358(16) 0.05189(14) 0.38187(17) 0.0370(5) Uani 1.00 1 d . . .
 N(2) N 0.60866(16) 0.18347(13) 0.36397(17) 0.0371(5) Uani 1.00 1 d . . .
 N(3) N 0.60157(18) 0.25548(14) 0.33213(19) 0.0404(6) Uani 1.00 1 d . . .
 N(4) N 0.50839(16) 0.15499(13) 0.15496(17) 0.0368(5) Uani 1.00 1 d . . .
 N(5) N 0.51316(17) 0.23051(13) 0.14891(18) 0.0379(6) Uani 1.00 1 d . . .
 N(6) N 0.71037(17) 0.16710(14) 0.24858(18) 0.0377(6) Uani 1.00 1 d . . .
 N(7) N 0.69025(18) 0.24132(14) 0.23158(19) 0.0411(6) Uani 1.00 1 d . . .
 N(8) N 0.51339(15) 0.03781(12) 0.29531(17) 0.0330(5) Uani 1.00 1 d . . .
 C(1) C 0.6170(2) 0.1851(2) 0.4580(2) 0.0490(8) Uani 1.00 1 d . . .
 C(2) C 0.6158(2) 0.2589(2) 0.4869(2) 0.0605(10) Uani 1.00 1 d . . .
 C(3) C 0.6057(2) 0.3012(2) 0.4061(2) 0.0534(9) Uani 1.00 1 d . . .
 C(4) C 0.4298(2) 0.1329(2) 0.0763(2) 0.0478(8) Uani 1.00 1 d . . .
 C(5) C 0.3825(2) 0.1947(2) 0.0197(2) 0.0582(9) Uani 1.00 1 d . . .
 C(6) C 0.4374(2) 0.2541(2) 0.0670(2) 0.0489(8) Uani 1.00 1 d . . .
 C(7) C 0.7952(2) 0.1564(2) 0.2505(2) 0.0467(8) Uani 1.00 1 d . . .
 C(8) C 0.8314(2) 0.2239(2) 0.2346(2) 0.0564(10) Uani 1.00 1 d . . .
 C(9) C 0.7629(2) 0.2755(2) 0.2223(2) 0.0518(9) Uani 1.00 1 d . . .
 C(10) C 0.4416(2) 0.06192(16) 0.3147(2) 0.0404(7) Uani 1.00 1 d . . .
 C(11) C 0.3937(3) 0.0000 0.3265(3) 0.0446(11) Uani 1.00 2 d S . .
 C(12) C 0.9930(9) 0.0341(5) 0.4659(8) 0.091(4) Uani 0.50 1 d P . .
 B(1) B 0.5978(2) 0.2725(2) 0.2293(3) 0.0425(9) Uani 1.00 1 d . . .
 H(1) H 0.594(2) 0.323(2) 0.215(2) 0.048(9) Uiso 1.00 1 c . . .
 H(2) H 0.6230 0.1416 0.4992 0.061 Uiso 1.00 1 c R . .
 H(3) H 0.6210 0.2766 0.5507 0.074 Uiso 1.00 1 c R . .
 H(4) H 0.6020 0.3553 0.4026 0.063 Uiso 1.00 1 c R . .
 H(5) H 0.4088 0.0814 0.0609 0.054 Uiso 1.00 1 c R . .
 H(6) H 0.3231 0.1951 -0.0405 0.066 Uiso 1.00 1 c R . .
 H(7) H 0.4241 0.3056 0.0452 0.059 Uiso 1.00 1 c R . .
 H(8) H 0.8275 0.1085 0.2614 0.057 Uiso 1.00 1 c R . .
 H(9) H 0.8919 0.2322 0.2326 0.069 Uiso 1.00 1 c R . .
 H(10) H 0.7660 0.3283 0.2091 0.063 Uiso 1.00 1 c R . .
 H(11) H 0.4258 0.1138 0.3196 0.051 Uiso 1.00 1 c R . .


loop_
_atom_site_aniso_label
_atom_site_aniso_U_11
_atom_site_aniso_U_22
_atom_site_aniso_U_33
_atom_site_aniso_U_12
_atom_site_aniso_U_13
_atom_site_aniso_U_23
 Ru(1) 0.03001(14) 0.03163(14) 0.02963(14) -0.00085(7) 0.01383(10) 0.00075(8)
 Br(1) 0.0671(3) 0.0692(3) 0.1267(5) 0.0000 0.0729(3) 0.0000
 Cl(1) 0.0483(5) 0.0391(4) 0.0360(4) 0.0000 0.0230(4) 0.0000
 Cl(2) 0.0869(13) 0.0975(14) 0.145(2) 0.0000 0.0332(13) 0.0000
 O(1) 0.0417(11) 0.0510(13) 0.0533(13) -0.0091(10) 0.0005(10) -0.0060(10)
 N(1) 0.0348(11) 0.0411(12) 0.0344(11) -0.0022(9) 0.0143(9) 0.0001(9)
 N(2) 0.0413(12) 0.0371(11) 0.0359(11) -0.0042(9) 0.0197(9) -0.0035(9)
 N(3) 0.0461(13) 0.0350(11) 0.0417(13) -0.0012(10) 0.0204(10) -0.0043(10)
 N(4) 0.0349(11) 0.0377(12) 0.0365(11) -0.0013(9) 0.0144(9) 0.0029(9)
 N(5) 0.0392(12) 0.0393(12) 0.0397(12) 0.0045(9) 0.0212(10) 0.0071(9)
 N(6) 0.0362(11) 0.0426(12) 0.0371(11) -0.0038(9) 0.0185(9) 0.0000(10)
 N(7) 0.0416(12) 0.0420(13) 0.0417(13) -0.0088(10) 0.0198(10) 0.0015(10)
 N(8) 0.0311(10) 0.0306(10) 0.0394(11) 0.0013(8) 0.0172(9) 0.0029(9)
 C(1) 0.0593(18) 0.0569(19) 0.0365(14) -0.0028(15) 0.0261(13) -0.0032(13)
 C(2) 0.077(2) 0.064(2) 0.0432(17) 0.0042(18) 0.0286(17) -0.0144(16)
 C(3) 0.0600(19) 0.0461(17) 0.0514(18) -0.0011(14) 0.0218(15) -0.0141(14)
 C(4) 0.0428(15) 0.0569(19) 0.0361(14) -0.0037(14) 0.0101(12) -0.0009(13)
 C(5) 0.0443(16) 0.083(2) 0.0390(16) 0.0054(17) 0.0098(13) 0.0118(16)
 C(6) 0.0502(17) 0.0581(19) 0.0402(15) 0.0122(14) 0.0214(13) 0.0164(14)
 C(7) 0.0339(13) 0.065(2) 0.0434(15) 0.0007(13) 0.0190(12) 0.0012(14)
 C(8) 0.0416(16) 0.082(2) 0.0499(18) -0.0160(16) 0.0242(14) 0.0013(17)
 C(9) 0.0514(17) 0.058(2) 0.0479(17) -0.0211(15) 0.0228(14) -0.0001(14)
 C(10) 0.0423(14) 0.0337(14) 0.0511(16) 0.0027(11) 0.0258(13) -0.0001(12)
 C(11) 0.038(2) 0.048(2) 0.057(2) 0.0000 0.0297(19) 0.0000
 C(12) 0.069(5) 0.082(5) 0.138(13) 0.008(5) 0.060(9) 0.030(5)
 B(1) 0.0476(18) 0.0337(16) 0.052(2) 0.0000(13) 0.0265(15) 0.0036(14)

#==============================================================================

_computing_data_collection            'CrystalClear'
_computing_cell_refinement            'CrystalClear'
_computing_data_reduction             'CrystalStructure'
_computing_structure_solution         'SIR92'
_computing_structure_refinement       'CRYSTALS'
_computing_publication_material       'CrystalStructure 3.8'
_computing_molecular_graphics          ?

#==============================================================================

# MOLECULAR GEOMETRY

_geom_special_details
;
    ENTER SPECIAL DETAILS OF THE MOLECULAR GEOMETRY
;

loop_
_geom_bond_atom_site_label_1
_geom_bond_atom_site_label_2
_geom_bond_distance
_geom_bond_publ_flag
_geom_bond_site_symmetry_1
_geom_bond_site_symmetry_2
Ru(1) Cl(1) 2.4159(8) yes . .
Ru(1) N(1) 1.866(2) yes . .
Ru(1) N(2) 2.043(2) yes . .
Ru(1) N(4) 2.091(2) yes . .
Ru(1) N(6) 2.078(2) yes . .
Ru(1) N(8) 2.065(2) yes . .
Br(1) C(11) 1.868(5) yes . .
Cl(2) C(12) 1.770(14) yes . .
Cl(2) C(12) 1.770(14) yes . 4_555
O(1) N(1) 1.190(2) yes . .
N(1) N(1) 1.856(3) yes . 4_555
N(2) N(3) 1.360(3) yes . .
N(2) C(1) 1.346(4) yes . .
N(3) C(3) 1.349(4) yes . .
N(3) B(1) 1.534(5) yes . .
N(4) N(5) 1.358(3) yes . .
N(4) C(4) 1.336(3) yes . .
N(5) C(6) 1.345(3) yes . .
N(5) B(1) 1.538(3) yes . .
N(6) N(7) 1.362(3) yes . .
N(6) C(7) 1.327(4) yes . .
N(7) C(9) 1.347(5) yes . .
N(7) B(1) 1.534(5) yes . .
N(8) N(8) 1.352(3) yes . 4_555
N(8) C(10) 1.344(4) yes . .
C(1) C(2) 1.390(5) yes . .
C(2) C(3) 1.369(5) yes . .
C(4) C(5) 1.391(5) yes . .
C(5) C(6) 1.354(5) yes . .
C(7) C(8) 1.396(5) yes . .
C(8) C(9) 1.363(5) yes . .
C(10) C(11) 1.389(4) yes . .
C(12) C(12) 0.938(18) yes . 2_756
C(12) C(12) 1.539(15) yes . 3_756
C(12) C(12) 1.220(12) yes . 4_555
C(1) H(2) 0.970 no . .
C(2) H(3) 0.970 no . .
C(3) H(4) 0.970 no . .
C(4) H(5) 0.970 no . .
C(5) H(6) 0.970 no . .
C(6) H(7) 0.970 no . .
C(7) H(8) 0.970 no . .
C(8) H(9) 0.970 no . .
C(9) H(10) 0.970 no . .
C(10) H(11) 0.970 no . .
B(1) H(1) 0.93(3) no . .

loop_
_geom_angle_atom_site_label_1
_geom_angle_atom_site_label_2
_geom_angle_atom_site_label_3
_geom_angle
_geom_angle_publ_flag
_geom_angle_site_symmetry_1
_geom_angle_site_symmetry_2
_geom_angle_site_symmetry_3
Cl(1) Ru(1) N(1) 89.46(8) yes . . .
Cl(1) Ru(1) N(2) 178.45(6) yes . . .
Cl(1) Ru(1) N(4) 91.36(7) yes . . .
Cl(1) Ru(1) N(6) 94.54(8) yes . . .
Cl(1) Ru(1) N(8) 87.34(7) yes . . .
N(1) Ru(1) N(2) 91.92(9) yes . . .
N(1) Ru(1) N(4) 178.18(10) yes . . .
N(1) Ru(1) N(6) 92.10(10) yes . . .
N(1) Ru(1) N(8) 91.87(10) yes . . .
N(2) Ru(1) N(4) 87.27(8) yes . . .
N(2) Ru(1) N(6) 86.10(10) yes . . .
N(2) Ru(1) N(8) 91.93(10) yes . . .
N(4) Ru(1) N(6) 86.22(9) yes . . .
N(4) Ru(1) N(8) 89.80(9) yes . . .
N(6) Ru(1) N(8) 175.63(8) yes . . .
Ru(1) Cl(1) Ru(1) 94.41(4) yes . . 4_555
C(12) Cl(2) C(12) 40.3(4) yes . . 4_555
Ru(1) N(1) O(1) 136.9(2) yes . . .
Ru(1) N(1) N(1) 116.92(12) yes . . 4_555
O(1) N(1) N(1) 106.21(19) yes . . 4_555
Ru(1) N(2) N(3) 119.5(2) yes . . .
Ru(1) N(2) C(1) 133.0(2) yes . . .
N(3) N(2) C(1) 107.3(2) yes . . .
N(2) N(3) C(3) 108.8(2) yes . . .
N(2) N(3) B(1) 119.8(2) yes . . .
C(3) N(3) B(1) 131.2(2) yes . . .
Ru(1) N(4) N(5) 118.99(14) yes . . .
Ru(1) N(4) C(4) 134.0(2) yes . . .
N(5) N(4) C(4) 107.0(2) yes . . .
N(4) N(5) C(6) 108.6(2) yes . . .
N(4) N(5) B(1) 119.2(2) yes . . .
C(6) N(5) B(1) 132.2(2) yes . . .
Ru(1) N(6) N(7) 118.6(2) yes . . .
Ru(1) N(6) C(7) 134.2(2) yes . . .
N(7) N(6) C(7) 107.0(2) yes . . .
N(6) N(7) C(9) 108.9(2) yes . . .
N(6) N(7) B(1) 119.8(2) yes . . .
C(9) N(7) B(1) 131.3(2) yes . . .
Ru(1) N(8) N(8) 122.1(2) yes . . 4_555
Ru(1) N(8) C(10) 129.15(18) yes . . .
N(8) N(8) C(10) 108.7(2) yes 4_555 . .
N(2) C(1) C(2) 109.4(3) yes . . .
C(1) C(2) C(3) 105.4(3) yes . . .
N(3) C(3) C(2) 109.0(3) yes . . .
N(4) C(4) C(5) 109.8(3) yes . . .
C(4) C(5) C(6) 105.0(2) yes . . .
N(5) C(6) C(5) 109.5(3) yes . . .
N(6) C(7) C(8) 110.2(3) yes . . .
C(7) C(8) C(9) 104.9(3) yes . . .
N(7) C(9) C(8) 109.0(3) yes . . .
N(8) C(10) C(11) 108.4(2) yes . . .
Br(1) C(11) C(10) 127.1(2) yes . . .
Br(1) C(11) C(10) 127.1(2) yes . . 4_555
C(10) C(11) C(10) 105.7(4) yes . . 4_555
Cl(2) C(12) C(12) 157.9(10) yes . . 2_756
Cl(2) C(12) C(12) 107.0(7) yes . . 3_756
Cl(2) C(12) C(12) 69.8(8) yes . . 4_555
C(12) C(12) C(12) 52.4(8) yes 2_756 . 3_756
C(12) C(12) C(12) 90.0(11) yes 2_756 . 4_555
C(12) C(12) C(12) 37.6(8) yes 3_756 . 4_555
N(3) B(1) N(5) 109.0(3) yes . . .
N(3) B(1) N(7) 106.1(2) yes . . .
N(5) B(1) N(7) 108.8(2) yes . . .
N(2) C(1) H(2) 125.3 no . . .
C(2) C(1) H(2) 125.3 no . . .
C(1) C(2) H(3) 127.3 no . . .
C(3) C(2) H(3) 127.3 no . . .
N(3) C(3) H(4) 125.5 no . . .
C(2) C(3) H(4) 125.5 no . . .
N(4) C(4) H(5) 125.1 no . . .
C(5) C(4) H(5) 125.1 no . . .
C(4) C(5) H(6) 127.5 no . . .
C(6) C(5) H(6) 127.5 no . . .
N(5) C(6) H(7) 125.2 no . . .
C(5) C(6) H(7) 125.2 no . . .
N(6) C(7) H(8) 124.9 no . . .
C(8) C(7) H(8) 124.9 no . . .
C(7) C(8) H(9) 127.6 no . . .
C(9) C(8) H(9) 127.6 no . . .
N(7) C(9) H(10) 125.5 no . . .
C(8) C(9) H(10) 125.5 no . . .
N(8) C(10) H(11) 125.8 no . . .
C(11) C(10) H(11) 125.8 no . . .
N(3) B(1) H(1) 113(2) no . . .
N(5) B(1) H(1) 110.7(17) no . . .
N(7) B(1) H(1) 109(2) no . . .

loop_
_geom_torsion_atom_site_label_1
_geom_torsion_atom_site_label_2
_geom_torsion_atom_site_label_3
_geom_torsion_atom_site_label_4
_geom_torsion
_geom_torsion_publ_flag
_geom_torsion_site_symmetry_1
_geom_torsion_site_symmetry_2
_geom_torsion_site_symmetry_3
_geom_torsion_site_symmetry_4
Cl(1) Ru(1) N(1) O(1) 144.8(3) ? . . . .
Cl(1) Ru(1) N(1) N(1) -35.09(18) ? . . . 4_555
N(1) Ru(1) Cl(1) Ru(1) 48.98(8) ? . . . 4_555
Cl(1) Ru(1) N(2) N(3) -71(3) ? . . . .
Cl(1) Ru(1) N(2) C(1) 115(2) ? . . . .
N(2) Ru(1) Cl(1) Ru(1) -105(2) ? . . . 4_555
Cl(1) Ru(1) N(4) N(5) -138.6(2) ? . . . .
Cl(1) Ru(1) N(4) C(4) 41.3(3) ? . . . .
N(4) Ru(1) Cl(1) Ru(1) -132.65(7) ? . . . 4_555
Cl(1) Ru(1) N(6) N(7) 135.42(18) ? . . . .
Cl(1) Ru(1) N(6) C(7) -49.9(2) ? . . . .
N(6) Ru(1) Cl(1) Ru(1) 141.04(6) ? . . . 4_555
Cl(1) Ru(1) N(8) C(10) -150.1(2) ? . . . .
Cl(1) Ru(1) N(8) N(8) 33.09(17) ? . . . 4_555
N(8) Ru(1) Cl(1) Ru(1) -42.91(5) ? . . . 4_555
N(1) Ru(1) N(2) N(3) 135.7(2) ? . . . .
N(1) Ru(1) N(2) C(1) -38.2(2) ? . . . .
N(2) Ru(1) N(1) O(1) -35.9(3) ? . . . .
N(2) Ru(1) N(1) N(1) 144.22(19) ? . . . 4_555
N(1) Ru(1) N(4) N(5) -22(3) ? . . . .
N(1) Ru(1) N(4) C(4) 158(3) ? . . . .
N(4) Ru(1) N(1) O(1) 28(3) ? . . . .
N(4) Ru(1) N(1) N(1) -152(3) ? . . . 4_555
N(1) Ru(1) N(6) N(7) -134.9(2) ? . . . .
N(1) Ru(1) N(6) C(7) 39.7(2) ? . . . .
N(6) Ru(1) N(1) O(1) 50.3(3) ? . . . .
N(6) Ru(1) N(1) N(1) -129.62(19) ? . . . 4_555
N(1) Ru(1) N(8) C(10) 120.5(2) ? . . . .
N(1) Ru(1) N(8) N(8) -56.29(19) ? . . . 4_555
N(8) Ru(1) N(1) O(1) -127.9(3) ? . . . .
N(8) Ru(1) N(1) N(1) 52.23(19) ? . . . 4_555
N(2) Ru(1) N(4) N(5) 42.1(2) ? . . . .
N(2) Ru(1) N(4) C(4) -138.0(3) ? . . . .
N(4) Ru(1) N(2) N(3) -42.7(2) ? . . . .
N(4) Ru(1) N(2) C(1) 143.4(2) ? . . . .
N(2) Ru(1) N(6) N(7) -43.16(19) ? . . . .
N(2) Ru(1) N(6) C(7) 131.5(2) ? . . . .
N(6) Ru(1) N(2) N(3) 43.68(19) ? . . . .
N(6) Ru(1) N(2) C(1) -130.2(2) ? . . . .
N(2) Ru(1) N(8) C(10) 28.5(2) ? . . . .
N(2) Ru(1) N(8) N(8) -148.28(18) ? . . . 4_555
N(8) Ru(1) N(2) N(3) -132.41(19) ? . . . .
N(8) Ru(1) N(2) C(1) 53.7(2) ? . . . .
N(4) Ru(1) N(6) N(7) 44.36(19) ? . . . .
N(4) Ru(1) N(6) C(7) -141.0(2) ? . . . .
N(6) Ru(1) N(4) N(5) -44.2(2) ? . . . .
N(6) Ru(1) N(4) C(4) 135.8(3) ? . . . .
N(4) Ru(1) N(8) C(10) -58.8(2) ? . . . .
N(4) Ru(1) N(8) N(8) 124.46(19) ? . . . 4_555
N(8) Ru(1) N(4) N(5) 134.0(2) ? . . . .
N(8) Ru(1) N(4) C(4) -46.0(3) ? . . . .
N(6) Ru(1) N(8) C(10) -34.5(13) ? . . . .
N(6) Ru(1) N(8) N(8) 148.7(12) ? . . . 4_555
N(8) Ru(1) N(6) N(7) 20.1(13) ? . . . .
N(8) Ru(1) N(6) C(7) -165.3(11) ? . . . .
C(12) Cl(2) C(12) C(12) -5.8(9) ? . . 4_555 2_756
C(12) Cl(2) C(12) C(12) -25(3) ? . . 4_555 3_756
C(12) Cl(2) C(12) C(12) 25(3) ? 4_555 . . 2_756
C(12) Cl(2) C(12) C(12) 5.8(9) ? 4_555 . . 3_756
Ru(1) N(1) N(1) O(1) 179.9(2) ? . . 4_555 4_555
O(1) N(1) N(1) Ru(1) -179.9(2) ? . . 4_555 4_555
Ru(1) N(2) N(3) C(3) -175.3(2) ? . . . .
Ru(1) N(2) N(3) B(1) 0.6(3) ? . . . .
Ru(1) N(2) C(1) C(2) 174.1(2) ? . . . .
N(3) N(2) C(1) C(2) -0.3(3) ? . . . .
C(1) N(2) N(3) C(3) 0.1(2) ? . . . .
C(1) N(2) N(3) B(1) 175.9(2) ? . . . .
N(2) N(3) C(3) C(2) 0.2(3) ? . . . .
N(2) N(3) B(1) N(5) 57.5(3) ? . . . .
N(2) N(3) B(1) N(7) -59.5(3) ? . . . .
C(3) N(3) B(1) N(5) -127.7(3) ? . . . .
C(3) N(3) B(1) N(7) 115.3(3) ? . . . .
B(1) N(3) C(3) C(2) -175.0(3) ? . . . .
Ru(1) N(4) N(5) C(6) -179.7(2) ? . . . .
Ru(1) N(4) N(5) B(1) 0.9(4) ? . . . .
Ru(1) N(4) C(4) C(5) 179.1(2) ? . . . .
N(5) N(4) C(4) C(5) -1.0(4) ? . . . .
C(4) N(4) N(5) C(6) 0.3(4) ? . . . .
C(4) N(4) N(5) B(1) -179.1(3) ? . . . .
N(4) N(5) C(6) C(5) 0.5(4) ? . . . .
N(4) N(5) B(1) N(3) -57.6(4) ? . . . .
N(4) N(5) B(1) N(7) 57.7(4) ? . . . .
C(6) N(5) B(1) N(3) 123.2(4) ? . . . .
C(6) N(5) B(1) N(7) -121.6(4) ? . . . .
B(1) N(5) C(6) C(5) 179.8(4) ? . . . .
Ru(1) N(6) N(7) C(9) 176.52(19) ? . . . .
Ru(1) N(6) N(7) B(1) -1.6(3) ? . . . .
Ru(1) N(6) C(7) C(8) -175.2(2) ? . . . .
N(7) N(6) C(7) C(8) -0.1(2) ? . . . .
C(7) N(6) N(7) C(9) 0.5(3) ? . . . .
C(7) N(6) N(7) B(1) -177.6(2) ? . . . .
N(6) N(7) C(9) C(8) -0.8(3) ? . . . .
N(6) N(7) B(1) N(3) 59.6(3) ? . . . .
N(6) N(7) B(1) N(5) -57.5(3) ? . . . .
C(9) N(7) B(1) N(3) -118.0(3) ? . . . .
C(9) N(7) B(1) N(5) 124.9(3) ? . . . .
B(1) N(7) C(9) C(8) 177.0(3) ? . . . .
Ru(1) N(8) N(8) C(10) 177.36(17) ? . . 4_555 4_555
Ru(1) N(8) C(10) C(11) -177.7(2) ? . . . .
N(8) N(8) C(10) C(11) -0.6(3) ? 4_555 . . .
C(10) N(8) N(8) Ru(1) -177.36(17) ? . . 4_555 4_555
N(2) C(1) C(2) C(3) 0.4(4) ? . . . .
C(1) C(2) C(3) N(3) -0.4(4) ? . . . .
N(4) C(4) C(5) C(6) 1.3(4) ? . . . .
C(4) C(5) C(6) N(5) -1.0(4) ? . . . .
N(6) C(7) C(8) C(9) -0.4(3) ? . . . .
C(7) C(8) C(9) N(7) 0.7(3) ? . . . .
N(8) C(10) C(11) Br(1) 178.4(2) ? . . . .
N(8) C(10) C(11) C(10) 0.9(3) ? . . . 4_555
Cl(2) C(12) C(12) Cl(2) -47(7) ? . . 2_756 2_756
Cl(2) C(12) C(12) C(12) -23(4) ? . . 2_756 3_756
Cl(2) C(12) C(12) C(12) -23(3) ? . . 2_756 4_555
Cl(2) C(12) C(12) C(12) 171.0(18) ? . . 3_756 2_756
Cl(2) C(12) C(12) C(12) -9.0(14) ? . . 3_756 4_555
Cl(2) C(12) C(12) C(12) 170.8(15) ? . . 4_555 2_756
Cl(2) C(12) C(12) C(12) 170.8(15) ? . . 4_555 3_756
C(12) C(12) C(12) Cl(2) 9.0(14) ? 2_756 . 3_756 2_756
C(12) C(12) C(12) Cl(2) -23(3) ? 3_756 . 2_756 2_756
C(12) C(12) C(12) Cl(2) -170.8(15) ? 2_756 . 4_555 .
C(12) C(12) C(12) Cl(2) -23(4) ? 4_555 . 2_756 2_756
C(12) C(12) C(12) Cl(2) -170.8(15) ? 3_756 . 4_555 .
C(12) C(12) C(12) Cl(2) -171.0(18) ? 4_555 . 3_756 2_756

loop_
_geom_contact_atom_site_label_1
_geom_contact_atom_site_label_2
_geom_contact_distance
_geom_contact_publ_flag
_geom_contact_site_symmetry_1
_geom_contact_site_symmetry_2
O(1) C(2) 3.383(4) ? . 7_656
O(1) C(3) 3.078(4) ? . 7_656
O(1) C(12) 3.310(16) ? . .
O(1) C(12) 3.265(14) ? . 2_756
N(5) C(5) 3.591(5) ? . 2_655
N(7) C(5) 3.501(4) ? . 2_655
C(2) O(1) 3.383(4) ? . 7_656
C(3) O(1) 3.078(4) ? . 7_656
C(5) N(5) 3.591(5) ? . 2_655
C(5) N(7) 3.501(4) ? . 2_655
C(6) C(6) 3.344(6) ? . 2_655
C(6) C(8) 3.560(6) ? . 8_455
C(8) C(6) 3.560(6) ? . 8_555
C(12) O(1) 3.310(16) ? . .
C(12) O(1) 3.265(14) ? . 2_756
Br(1) H(2) 3.206 ? . 2_656
Br(1) H(2) 3.206 ? . 3_656
Cl(1) H(5) 3.521 ? . 2_655
Cl(1) H(5) 3.521 ? . 3_655
Cl(2) H(4) 3.051 ? . 5_545
Cl(2) H(4) 3.051 ? . 8_555
Cl(2) H(8) 2.978 ? . .
Cl(2) H(8) 2.978 ? . 4_555
O(1) H(3) 3.154 ? . 7_656
O(1) H(4) 2.491 ? . 7_656
N(2) H(9) 3.435 ? . 8_455
N(3) H(9) 2.957 ? . 8_455
N(4) H(9) 3.244 ? . 8_455
N(5) H(9) 2.760 ? . 8_455
N(6) H(3) 3.167 ? . 7_656
N(6) H(6) 2.948 ? . 2_655
N(7) H(3) 3.314 ? . 7_656
N(7) H(6) 2.877 ? . 2_655
C(2) H(3) 3.506 ? . 2_656
C(3) H(9) 3.267 ? . 8_455
C(4) H(9) 3.572 ? . 8_455
C(5) H(9) 3.367 ? . 8_455
C(6) H(7) 3.384 ? . 2_655
C(6) H(9) 2.852 ? . 8_455
C(7) H(3) 2.919 ? . 7_656
C(7) H(6) 2.938 ? . 2_655
C(8) H(3) 2.947 ? . 7_656
C(8) H(6) 2.892 ? . 2_655
C(8) H(11) 3.253 ? . 8_555
C(9) H(3) 3.198 ? . 7_656
C(9) H(6) 2.832 ? . 2_655
C(9) H(11) 3.048 ? . 8_555
C(10) H(10) 3.178 ? . 8_455
C(12) H(4) 3.528 ? . 7_656
C(12) H(4) 3.014 ? . 8_555
C(12) H(8) 3.297 ? . .
B(1) H(9) 3.237 ? . 8_455
H(1) H(9) 3.421 ? . 8_455
H(2) Br(1) 3.206 ? . 2_656
H(2) H(11) 3.141 ? . 2_656
H(3) O(1) 3.154 ? . 7_656
H(3) N(6) 3.167 ? . 7_656
H(3) N(7) 3.314 ? . 7_656
H(3) C(2) 3.506 ? . 2_656
H(3) C(7) 2.919 ? . 7_656
H(3) C(8) 2.947 ? . 7_656
H(3) C(9) 3.198 ? . 7_656
H(3) H(3) 3.406 ? . 2_656
H(3) H(8) 3.273 ? . 7_656
H(3) H(9) 3.318 ? . 7_656
H(4) Cl(2) 3.051 ? . 5_455
H(4) O(1) 2.491 ? . 7_656
H(4) C(12) 3.528 ? . 7_656
H(4) C(12) 3.014 ? . 8_455
H(4) H(9) 3.521 ? . 8_455
H(5) Cl(1) 3.521 ? . 2_655
H(6) N(6) 2.948 ? . 2_655
H(6) N(7) 2.877 ? . 2_655
H(6) C(7) 2.938 ? . 2_655
H(6) C(8) 2.892 ? . 2_655
H(6) C(9) 2.832 ? . 2_655
H(6) H(6) 3.591 ? . 7_555
H(6) H(8) 3.466 ? . 2_655
H(6) H(9) 3.398 ? . 2_655
H(6) H(10) 3.295 ? . 2_655
H(7) C(6) 3.384 ? . 2_655
H(7) H(7) 3.194 ? . 2_655
H(7) H(9) 3.111 ? . 8_455
H(8) Cl(2) 2.978 ? . .
H(8) C(12) 3.297 ? . .
H(8) H(3) 3.273 ? . 7_656
H(8) H(6) 3.466 ? . 2_655
H(9) N(2) 3.435 ? . 8_555
H(9) N(3) 2.957 ? . 8_555
H(9) N(4) 3.244 ? . 8_555
H(9) N(5) 2.760 ? . 8_555
H(9) C(3) 3.267 ? . 8_555
H(9) C(4) 3.572 ? . 8_555
H(9) C(5) 3.367 ? . 8_555
H(9) C(6) 2.852 ? . 8_555
H(9) B(1) 3.237 ? . 8_555
H(9) H(1) 3.421 ? . 8_555
H(9) H(3) 3.318 ? . 7_656
H(9) H(4) 3.521 ? . 8_555
H(9) H(6) 3.398 ? . 2_655
H(9) H(7) 3.111 ? . 8_555
H(9) H(11) 2.990 ? . 8_555
H(10) C(10) 3.178 ? . 8_555
H(10) H(6) 3.295 ? . 2_655
H(10) H(11) 2.538 ? . 8_555
H(11) C(8) 3.253 ? . 8_455
H(11) C(9) 3.048 ? . 8_455
H(11) H(2) 3.141 ? . 2_656
H(11) H(9) 2.990 ? . 8_455
H(11) H(10) 2.538 ? . 8_455
N(1) N(1) 1.856(3) ? . 4_555
Ru(1) Ru(1) 3.5455(2) ? . 4_555


#==============================================================================

# Additional structures and associated data_? identifiers
# should be added at this point if there is more than one 
# structure analysis in the CIF.

#==============================================================================

#     End of CIF

#==============================================================================
